# Supplementary material for: A Novel Multistage Transfer Learning for Ultrasound Breast Cancer Image Classification
Source: MDPI journal article supplement (doi:10.3390/diagnostics12010135), 2022-01-06
Supplement: s1 [file s1]

# Supplementary Materials: A novel multistage transfer learning for ultrasound breast cancer image classification

Gelan Ayana, Jinhyung Park, Jin-Woo Jeong \* and Se-woon Choe \*

**Table S1.** Five-fold cross validation comparison results of each model for the conventional as well as multistage transfer learning methods.

| Transfer learning type | CNN             | Optimizer | Five-fold cross validation test accuracy (%) |             |             |             |             |             |
|------------------------|-----------------|-----------|----------------------------------------------|-------------|-------------|-------------|-------------|-------------|
|                        |                 |           | Fold 1                                       | Fold 2      | Fold 3      | Fold 4      | Fold 5      | Average     |
| ImageNet based CTL     | InceptionV3     | SGD       | 97.50000238                                  | 72.50000238 | 80.00000119 | 92.50000119 | 75          | 83.50000143 |
|                        |                 | Adam      | 75                                           | 72.50000238 | 82.49999881 | 50          | 72.50000238 | 70.50000072 |
|                        |                 | Adagrad   | 100                                          | 97.50000238 | 89.99999762 | 94.99999881 | 100         | 96.49999976 |
|                        | Efficient-NetB2 | SGD       | 69.99999881                                  | 67.50000119 | 60.00000238 | 64.99999762 | 67.50000119 | 66.00000024 |
|                        |                 | Adam      | 100                                          | 94.99999881 | 77.49999762 | 97.50000238 | 100         | 93.99999976 |
|                        |                 | Adagrad   | 92.50000119                                  | 82.49999881 | 94.99999881 | 92.50000119 | 85.00000238 | 89.50000048 |
|                        | ResNet50        | SGD       | 92.50000119                                  | 92.50000119 | 87.5        | 97.50000238 | 82.49999881 | 90.50000072 |
|                        |                 | Adam      | 52.49999762                                  | 67.50000119 | 97.50000238 | 97.50000238 | 92.50000119 | 81.50000095 |
|                        |                 | Adagrad   | 100                                          | 89.99999762 | 100         | 97.50000238 | 100         | 97.5        |
| The proposed MSTL      | InceptionV3     | SGD       | 97.50000238                                  | 97.50000238 | 85.00000238 | 80.00000119 | 82.49999881 | 88.50000143 |
|                        |                 | Adam      | 92.50000119                                  | 85.00000238 | 97.50000238 | 97.50000238 | 92.50000119 | 93.00000191 |
|                        |                 | Adagrad   | 94.99999881                                  | 92.50000119 | 94.99999881 | 97.50000238 | 92.50000119 | 94.50000048 |
|                        | Efficient-NetB2 | SGD       | 67.50000119                                  | 75          | 72.50000238 | 80.00000119 | 87.5        | 76.50000095 |
|                        |                 | Adam      | 100                                          | 94.99999881 | 100         | 94.99999881 | 100         | 97.99999952 |
|                        |                 | Adagrad   | 100                                          | 97.50000238 | 92.50000119 | 94.99999881 | 97.50000238 | 96.50000095 |
|                        | ResNet50        | SGD       | 100                                          | 100         | 94.99999881 | 97.50000238 | 100         | 98.50000024 |
|                        |                 | Adam      | 94.99999881                                  | 100         | 94.99999881 | 97.50000238 | 94.99999881 | 96.49999976 |
|                        |                 | Adagrad   | 100                                          | 97.50000238 | 100         | 97.50000238 | 100         | 99.00000095 |

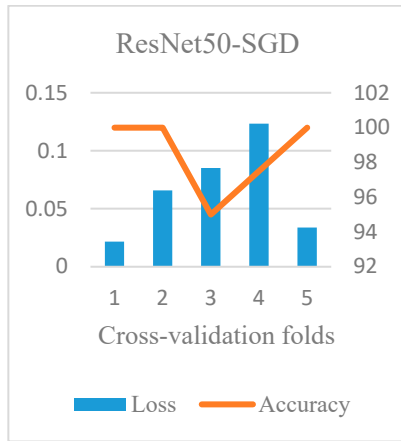

(i)

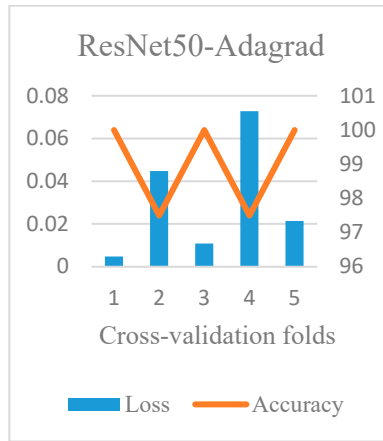

(ii)

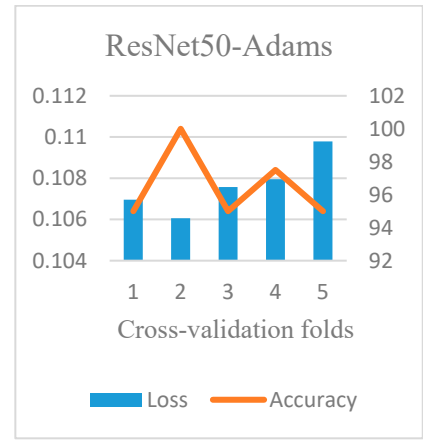

(iii)

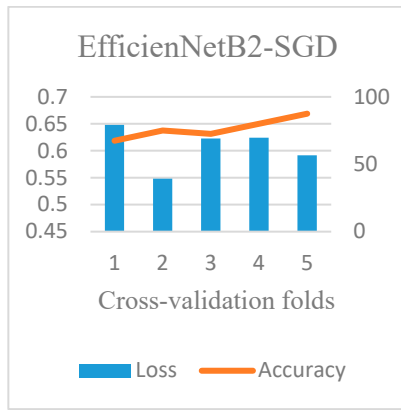

(iv)

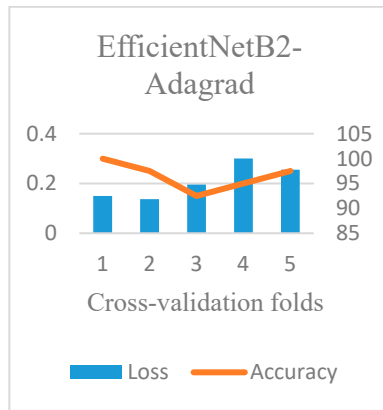

(v)

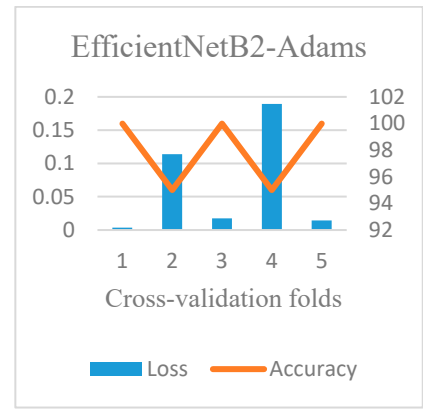

(vi)

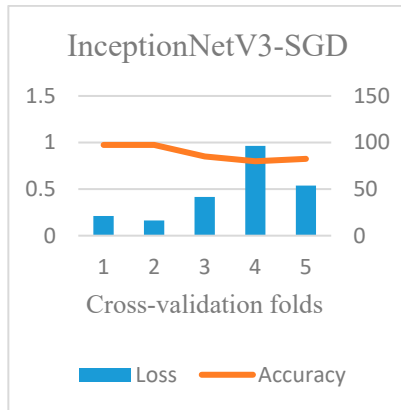

(vii)

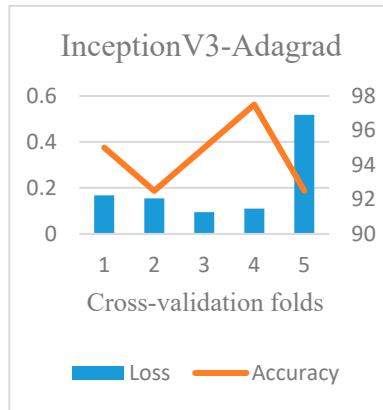

(viii)

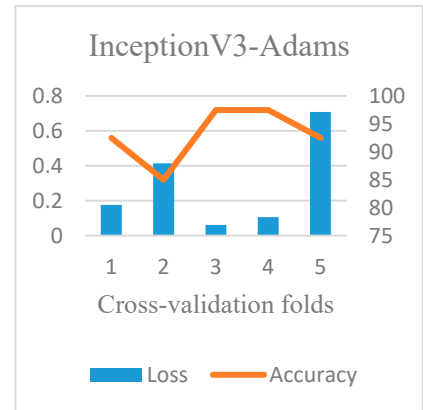

(ix)

**Figure S1.** Individual learning curves for the multistage transfer learning models over 5-fold cross-validation. (i) ResNet50-SGD (ii) ResNet50-Adagrad (iii) ResNet50-Adam (iv) EfficientNetB2-SGD (v) EfficientNetB2-Adagrad (vi) EfficientNetB2-Adam (vii) InceptionNetV3-SGD (viii) InceptionNetV3-Adagrad (ix) InceptionNetV3-Adam.

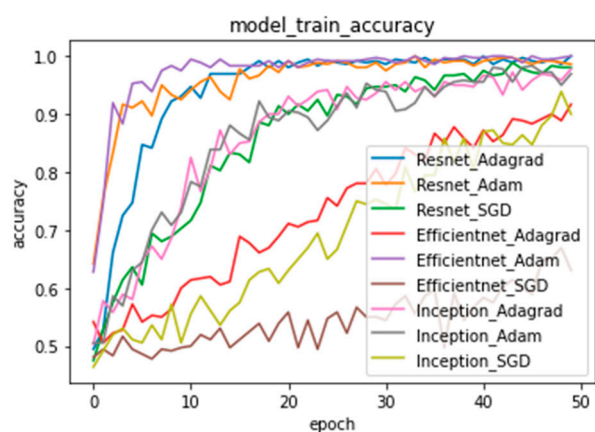

(i)

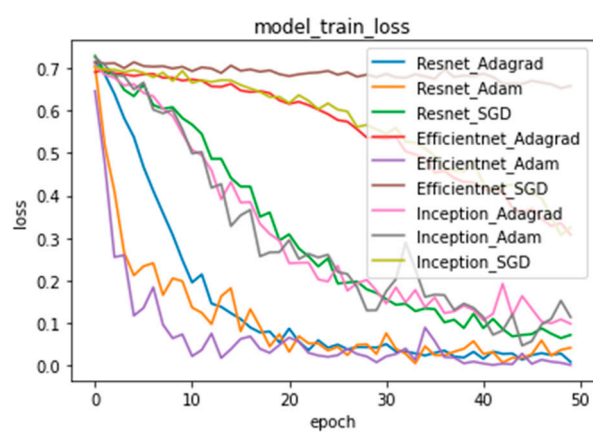

(ii)

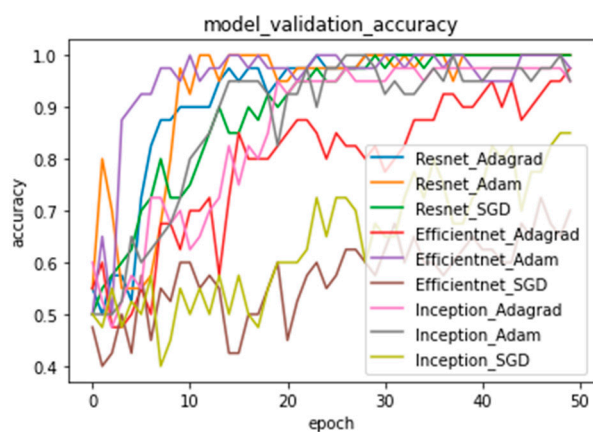

(iii)

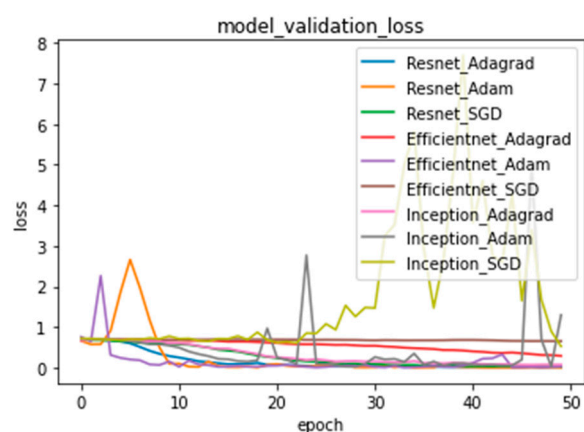

(iv)

**Figure S2.** Multistage transfer learning models training and validation accuracy and loss curves. (i) Training accuracy curve (ii) Training loss curve (iii) Validation accuracy curve (iv) Validation loss curve.
